# Supplementary material
Source: publisher figshare collection journal article supplement (https://acs.figshare.com/ndownloader/files/4544695)
Supplement: Supplementary file 1 [file 4544695]

## **-SUPPORTING INFORMATION-**

# Rates and Extent of Reduction of Fe(III) Compounds and O<sub>2</sub> by Humic Substances

*Iris Bauer and Andreas Kappler\**

Geomicrobiology, Center for Applied Geosciences, University of Tuebingen, Germany

\*To whom correspondence should be sent:

Andreas Kappler, Geomicrobiology, Center for Applied Geosciences

University of Tuebingen, Sigwartstrasse 10, D-72076 Tuebingen, Germany

Phone: +49-7071-2974992, Fax: +49-7071-5059, email: [andreas.kappler@uni-tuebingen.de](mailto:andreas.kappler@uni-tuebingen.de)

- 5 Pages (including cover page)
- 3 Figures
- 1 Table

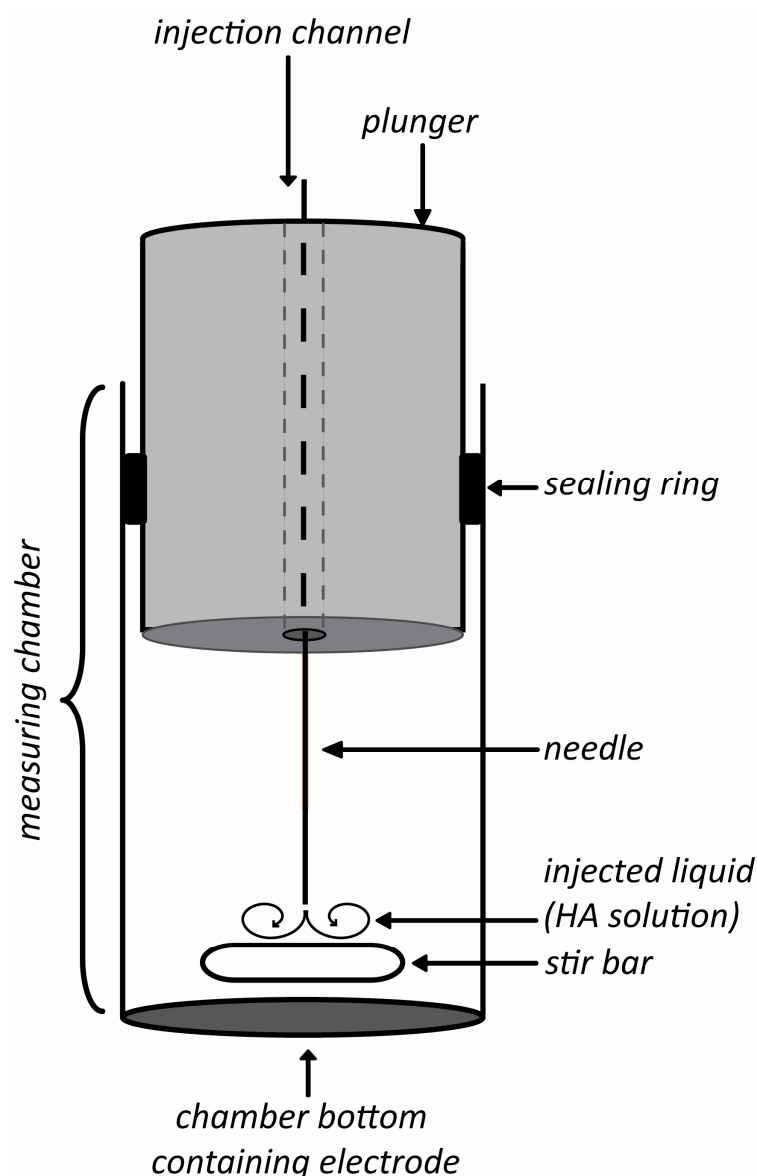

Figure S1: Schematic drawing of the measuring chamber of the O<sub>2</sub> electrode (OX1LP dissolved O<sub>2</sub> package, Qubit systems).

### **O<sub>2</sub> electrode: Experimental Setup of Quantification of O<sub>2</sub> Reduction by HA**

The setup consists of a polarographic O<sub>2</sub> electrode at the bottom of a closed measuring chamber (adjustable volume of up to 6 mL, Figure S1). At the bottom of the chamber, O<sub>2</sub> diffuses through a Teflon membrane covering a Pt cathode, where O<sub>2</sub> reduction and thus quantification takes place. The cathode is in electrical continuity with an Ag-AgCl anode via a KCl electrolyte solution. HA preparations were deoxygenated and filtered. Aliquots (0.2-0.5 ml) of reduced or non-reduced HA preparations, at different concentrations, were injected through a 1 mm wide and 1.3 cm long channel from the top into the measuring chamber. Before HA injection, we adjusted the volume of the chamber to 3 mL and filled the chamber

completely with air-saturated phosphate buffer (50 mM, pH 7) or water. For injection, a 1 mL syringe (Kendall Monoject) with a long needle (Braun Sterican, 0.6 x 60 mm) was used. Thus the HA preparations could be injected into the phosphate buffer or water as close as possible to a magnetic stirring bar at the bottom of the measuring chamber to guarantee instantaneous homogeneous mixing. The increase in liquid volume in the chamber during injection caused a slight rise of fluid into the injection channel, which had no effect on the measurement. Injection of an anoxic solution into the oxic fluid in the measuring chamber led to a decrease in O<sub>2</sub>-content due to dilution. This decrease was considered in the calculations of O<sub>2</sub>-consumption by HA. Diffusion of O<sub>2</sub> into the chamber through the injection channel during the time of the measurements was negligible. Before each measurement, the system was calibrated with a two-point-calibration using air-saturated phosphate buffer or water (defined as 100% O<sub>2</sub>) vs phosphate buffer or water which was bubbled with N<sub>2</sub> (defined as 0% O<sub>2</sub>). After proper calibration the electrode was able to resolve changes of 0.1% O<sub>2</sub>. Current air pressure and temperature were taken into account.

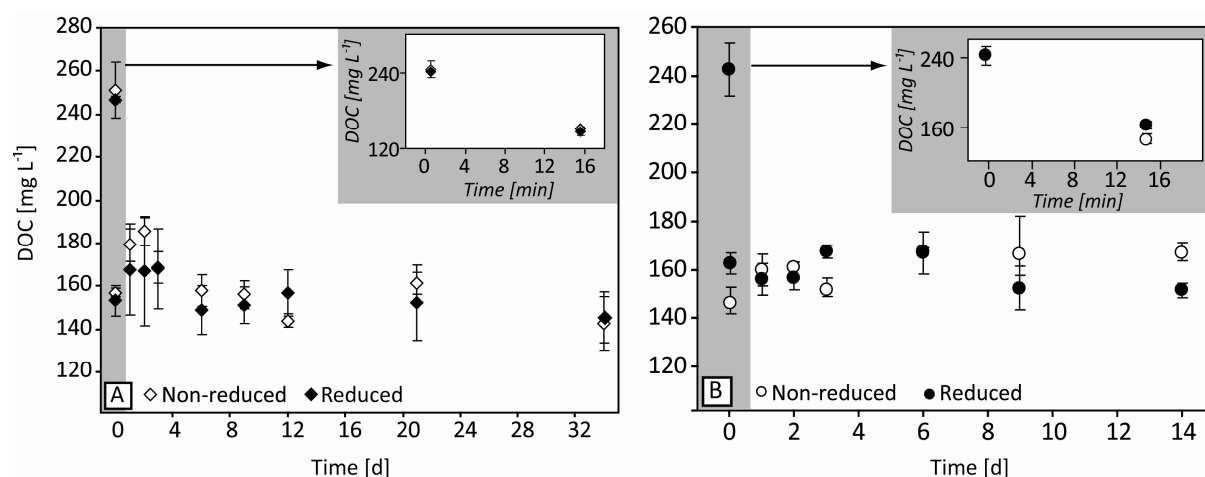

Figure S2: Amount of humic substances sorbed to goethite (A) and hematite (B) mineral surfaces during reduction by IHSS Pahokee Peat HA. Figures show dissolved organic carbon (DOC) over time. Open symbols represent non-reduced HS, closed symbols stand for reduced HS. Standard deviations were calculated from three independent parallels. Grey inserts represent an enlargement of the first two sampling points (before and 15 minutes after addition of Fe(III) minerals). Multi-point BET measurements yielded surface areas of 9.2 m<sup>2</sup> g<sup>-1</sup> for goethite and 2.3 m<sup>2</sup> g<sup>-1</sup> for hematite. Ferrihydrite (not shown here) had a surface area of 249 m<sup>2</sup> g<sup>-1</sup>.

Table S1: Redox potential values of predominant Fe(III)/Fe(II) redox couples reacting with HA at pH 7.  $E_h^0$  values from literature as well as in-situ  $E_h'$  values are given which were calculated using equations 1-4 given below. For calculations, initial and final experimental concentrations of Fe(III)/Fe(II) were used. For Fe(III) citrate, initial concentration of Fe(II) was 5  $\mu$ M due to some Fe(II) present in Fe(III) citrate solutions; for all Fe(III) minerals, an initial concentration of Fe(II) of 1  $\mu$ M (detection limit of ferrozine assay) was used. Concentrations were used instead of activities for simplification.

| Fe(III)/Fe(II) redox couples                       | $E_h^0$ [mV]                      | $E_h'$ [mV]<br>(initial) | $E_h'$ [mV]<br>(final) |
|----------------------------------------------------|-----------------------------------|--------------------------|------------------------|
| Fe(III) citrate/Fe(II) citrate                     | + 372 <sup>b</sup>                | + 933                    | + 833                  |
| <sup>a</sup> Fe(OH) <sub>3</sub> /Fe <sup>2+</sup> | - 100 to + 100 <sup>b,c,d,e</sup> | + 18                     | - 77                   |
| $\alpha$ -FeOOH/Fe <sup>2+</sup>                   | - 274 <sup>b</sup>                | - 215                    | - 320                  |
| Fe <sub>2</sub> O <sub>3</sub> /Fe <sup>2+</sup>   | - 287 <sup>b</sup>                | - 228                    | - 328                  |

<sup>a</sup> for  $E_h'$  calculations, a value of  $E_h^0 = 0$  mV was used

<sup>b</sup> from [1]

<sup>c</sup> from [2]

<sup>d</sup> from [3]

<sup>e</sup> from [4]

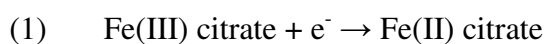

$$E_h' = E_h^0 + 0.059 \cdot \lg \frac{[Fe(III)citrate]}{[Fe(II)citrate]}$$

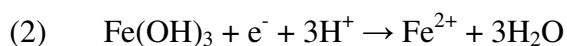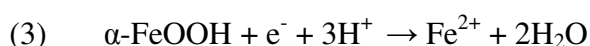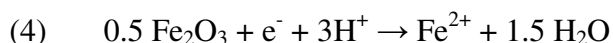

$$E_h' = E_h^0 + 0.059 \cdot \lg \frac{(H^+)^3}{(Fe^{2+})}$$

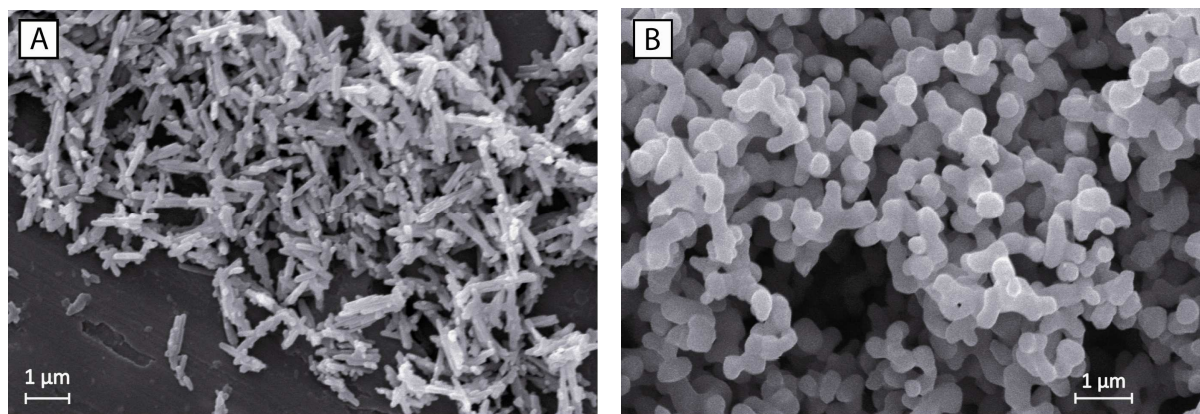

Figure S3: Scanning electron micrographs of goethite (A) and hematite (B) used in our experiments. (A) shows characteristic needle-shaped crystals of goethite with particle sizes ranging from 0.2-0.9 µm. (B) shows hematite crystals with particles of a size range of 0.1-0.3 µm (that form larger aggregates). Size bar in both images indicates a length of 1 µm.

## REFERENCES

1. Straub, K. L.; Benz, M.; Schink, B., Iron metabolism in anoxic environments at near neutral pH. *FEMS Microbiol. Ecol.* **2001**, *34*, (3), 181-186.
2. Bauer, M.; Heitmann, T.; Macalady, D. L.; Blodau, C., Electron transfer capacities and reaction kinetics of peat dissolved organic matter. *Environ. Sci. Technol.* **2007**, *41*, (1), 139-145.
3. Hernandez, M. E.; Newman, D. K., Extracellular electron transfer. *Cell. Mol. Life Sci.* **2001**, *58*, (11), 1562-1571.
4. Widdel, F.; Schnell, S.; Heising, S.; Ehrenreich, A.; Assmus, B.; Schink, B., Ferrous iron oxidation by anoxygenic phototrophic bacteria. *Nature* **1993**, *362*, 834-836.
